# Supplementary material for: Identification of candidate flavonoid pathway genes using transcriptome correlation network analysis in ripe strawberry (Fragaria × ananassa) fruits
Source: PubMed Central journal article supplement (PMC4507756; doi:10.1093/jxb/erv205), 2015-05-15
Supplement: supp_erv205_erv205_supplementaryData_SH.pdf [file supp_erv205_erv205_supplementaryData_SH.pdf]

Table S1. List of primers used in the study

| Gene      | Experiment     | Primers | Sequences (5'-3')                                    |
|-----------|----------------|---------|------------------------------------------------------|
| gene13212 | Silencing      | Forward | GGGGACAAGTTTGTACAAAAAAGCAGGCTACTCAGTTCCTCTACGAGCTCT  |
| gene13212 | Silencing      | Reverse | GGGGACCACTTTGTACAAGAAAGCTGGGTGCTTGTGACCCACCACGTTG    |
| gene09614 | Overexpression | Forward | GGGGACAAGTTTGTACAAAAAAGCAGGCTTATGGGCTCCGAGATGGCCCTC  |
| gene09614 | Overexpression | Reverse | GGGGACCACTTTGTACAAGAAAGCTGGGTCTAGAATCTCACTTCTCTAGT   |
| gene17673 | Overexpression | Forward | GGGGACAAGTTTGTACAAAAAAGCAGGCTTGATGAGGGGAAGCAGCTCCAAT |
| gene17673 | Overexpression | Reverse | GGGGACCACTTTGTACAAGAAAGCTGGGTCAATTATCCCCAGTAGGAAA    |
| gene13212 | qPCR           | Forward | ACCGGGTTTCGGTTTCTATG                                 |
| gene13212 | qPCR           | Reverse | CCTGTGGTCAATCATCTTCTTCT                              |
| gene09614 | qPCR           | Forward | GAGATCGACCAACACTAAGGAC                               |
| gene09614 | qPCR           | Reverse | CTCCCTTGTGAGTTGGAAGATT                               |
| gene17673 | qPCR           | Forward | CTGAGGAGCTTATGCCCTTATC                               |
| gene17673 | qPCR           | Forward | GGTATTGGTATTTGGATTGGGATTT                            |
| PAL1      | qPCR           | Reverse | GAAGGACTTGCTTTGGTGAATG                               |
| PAL1      | qPCR           | Forward | GATCTCGAAAGAACAGCTAGAG                               |
| PAL2      | qPCR           | Reverse | GAGCAGCCATGCTTGTTAGA                                 |
| PAL2      | qPCR           | Forward | AGGGAGTAATGTTGTGGTTGAG                               |
| C4H       | qPCR           | Reverse | TGCGCAGAGCTTTGAGTATAA                                |
| C4H       | qPCR           | Forward | TCTTCTCCTCACCTCCTTACA                                |
| 4CL       | qPCR           | Reverse | CGTCAGACTCTATTGCCGATTT                               |
| 4CL       | qPCR           | Forward | ATGAAGTCCGGTGCGTTAG                                  |
| CHS1      | qPCR           | Reverse | AGACAAGACATGGTGGTAGTTG                               |
| CHS1      | qPCR           | Forward | AAGTGGGTGATTCTGGACTTG                                |
| CHS2      | qPCR           | Forward | GCTCACATTTACCTCCTCAA                                 |
| CHS2      | qPCR           | Reverse | TCCAGTCGGTAATGTTCAAAGG                               |
| CHI       | qPCR           | Forward | TCGGAGTCTACTGGAGGATAAG                               |
| CHI       | qPCR           | Reverse | CGATCTCCCTGAAGAACTCAAC                               |
| F3H       | qPCR           | Forward | CTTCATCGTTTCCAGCCATTT                                |
| F3H       | qPCR           | Reverse | ACTGCGTTGTACATCTCTC                                  |
| F3'H      | qPCR           | Forward | CCGTAGCGTCTCAGTTCTTG                                 |
| F3'H      | qPCR           | Reverse | ACGAGGTCCTGGTAGTTGTA                                 |
| DFR       | qPCR           | Forward | CCGGACTTTCGCCTCTATTT                                 |
| DFR       | qPCR           | Reverse | GCTTTCGGATGCTCGTACA                                  |
| ANS       | qPCR           | Forward | GGAGAAATGTAGGGAGGAGTTG                               |
| ANS       | qPCR           | Forward | TTCTTGACCCGTTCCATGAG                                 |
| UFGT      | qPCR           | Reverse | TGGTCACGATGAGAAGGAAAC                                |
| UFGT      | qPCR           | Forward | GACTCCAAGTTTCCGAAGATGA                               |
| ANR1      | qPCR           | Reverse | TAACCGATGAAGGGAGCTTTG                                |
| ANR1      | qPCR           | Forward | GGCTTGATCATGTGTTCTCT                                 |
| LAR       | qPCR           | Reverse | CATGATTTGGAGAAGCGCAAG                                |
| LAR       | qPCR           | Forward | GTTGTCATAGTAGGGCCAAGAA                               |
| FLS       | qPCR           | Reverse | GCAGGAGGAGAAAGAGGTTTAC                               |
| FLS       | qPCR           | Forward | CCCTTCTTCCCTTCCAGTTC                                 |
| Myb9      | qPCR           | Reverse | CCGGATCATCCAAGGAAACA                                 |
| Myb9      | qPCR           | Forward | CCTAGTGGCCTTGGTTCTTATT                               |
| Myb10     | qPCR           | Forward | TGGCATCATGTTCTCTCAAA                                 |
| Myb10     | qPCR           | Reverse | CTCTGCAAACCTCTCTCTTTG                                |
| Myb11     | qPCR           | Forward | GATGGTCTTTGATAGCGGGTAG                               |
| Myb11     | qPCR           | Reverse | TGGTGGTTTGTGGTGAATAAT                                |

**Supplementary Figure 1**

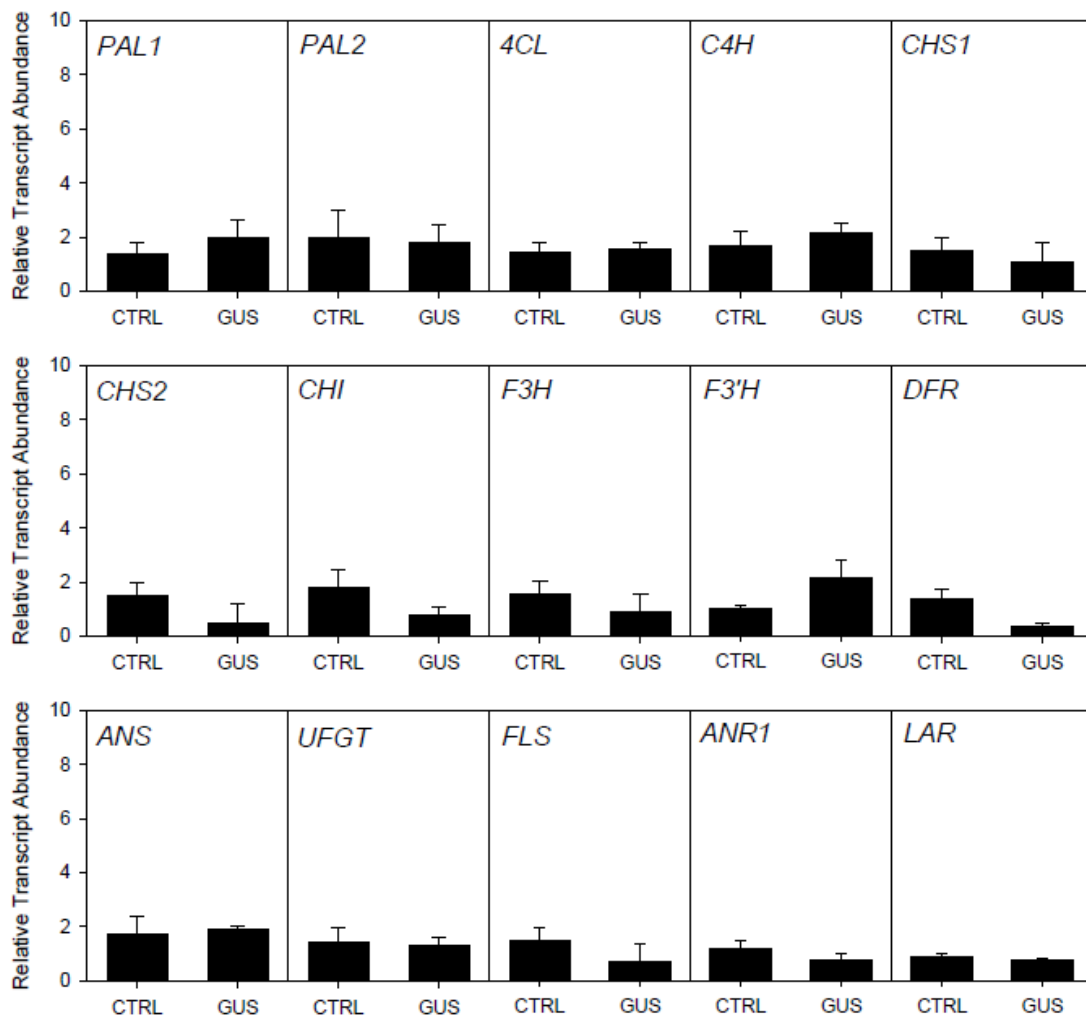

**Supplementary Fig. S1.** Assessment for effects of the agroinfiltration process on induction of flavonoid pathway genes. Fruits were infiltrated with bacteria bearing a 'GUS' containing sequence. No significant changes were observed.

Supplementary Figure 2

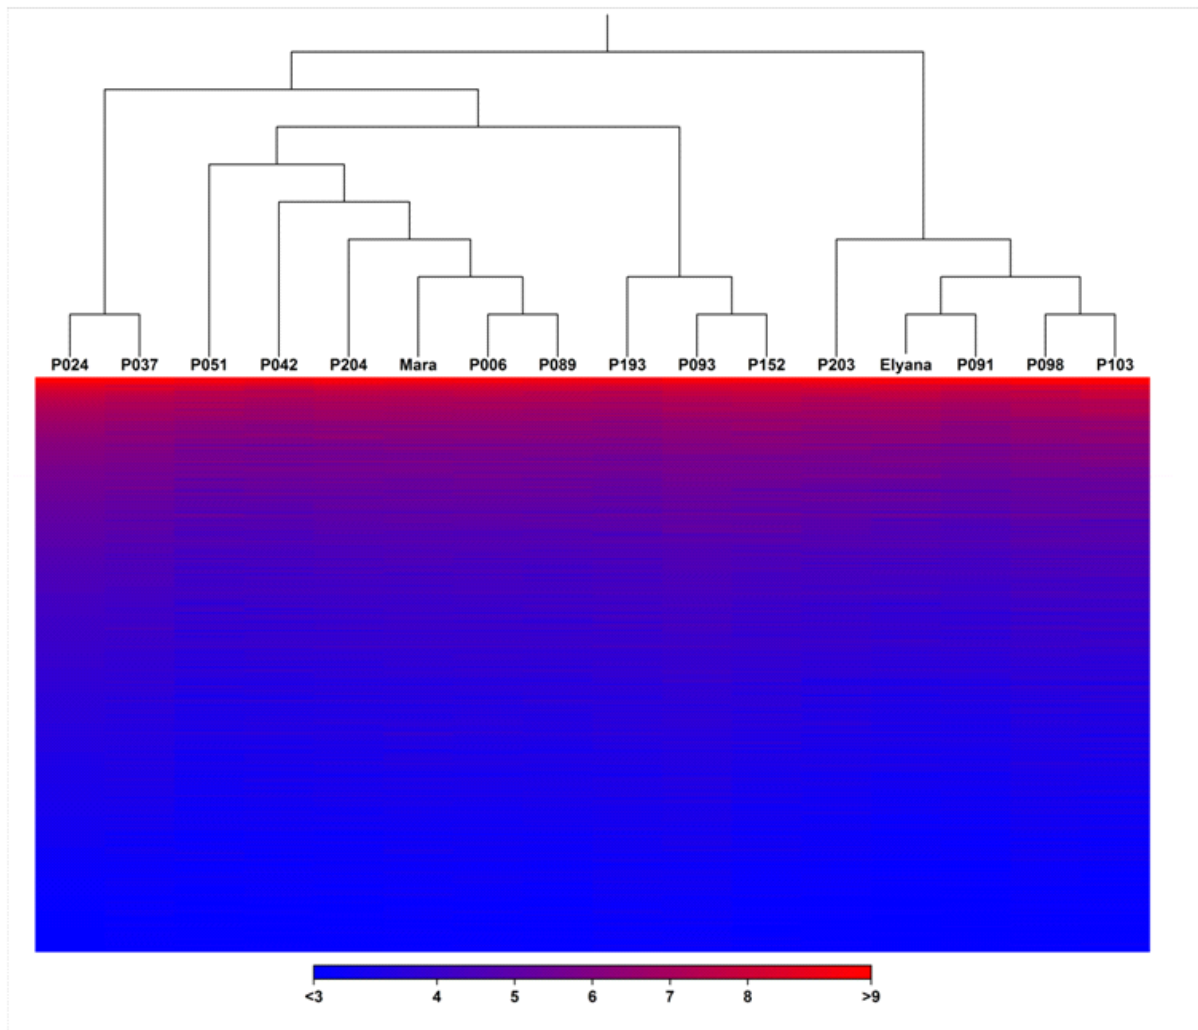

**Supplementary Fig. S2.** Hierarchical clustering of the 'Mara des Bois' x 'Elyana' F1 population. The dendrogram was assembled based on the transcriptome of each individual, and only expressed genes (RPKM max of 1 in at least one genotype) were included. RPKM values were transformed in Log2. Hierarchical clustering was built using Manhattan distance.
